# Supplementary material for: RAFT polymerisation of renewable terpene (meth)acrylates and the convergent synthesis of methacrylate–acrylate–methacrylate triblock copolymers
Source: Royal Society of Chemistry journal article supplement (doi:10.1039/d1py00326g), 2021-01-01
Supplement: d1py00326g1.pdf [file d1py00326g1.pdf]

## RAFT Polymerisation of Renewable Terpene (Meth)acrylates and the Convergent Synthesis of Methacrylate-Acrylate-Methacrylate Triblock Copolymers – Electronic Supplementary Information

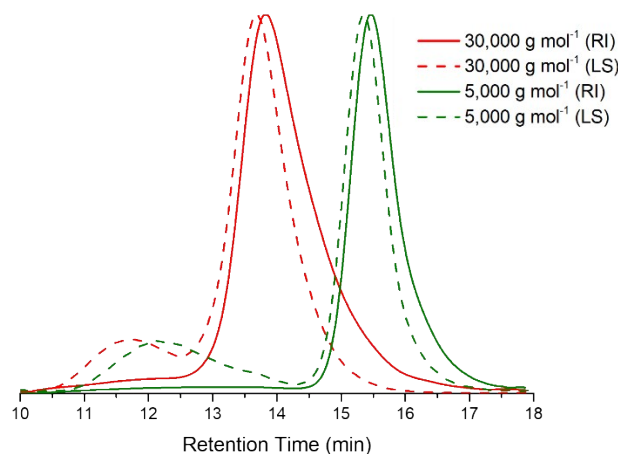

**Figure S1:** GPC traces for LiMA polymers produced using RAFT polymerisation, targeting 5,000 and 30,000 g mol<sup>-1</sup>. RI traces are indicated by a solid line, and LS traces by a dashed line.

**Table S1:** GPC results for the synthesis of PMMA macro-RAFT agents (top) and for each of the diblock copolymers (bottom).

| Macro RAFT | Target $M_n$<br>(g mol <sup>-1</sup> ) | Time (h) | Conv. <sup>a</sup> (%) | $M_n$ (th)<br>(g mol <sup>-1</sup> ) | $M_n^b$<br>(g mol <sup>-1</sup> ) | $M_w^b$<br>(g mol <sup>-1</sup> ) | $\mathcal{D}^b$ |
|------------|----------------------------------------|----------|------------------------|--------------------------------------|-----------------------------------|-----------------------------------|-----------------|
| PMMA1      | 30,000                                 | 7        | 50                     | 15,000                               | 16,400                            | 19,500                            | 1.19            |
| PMMA2      | 40,000                                 | 7h30     | 36                     | 14,400                               | 18,700                            | 23,600                            | 1.27            |

| Macro-RAFT | Monomer      | Target $M_n$ B2 (g mol <sup>-1</sup> ) | Conv. <sup>a</sup> (%) | $M_n$ (th)<br>(g mol <sup>-1</sup> ) | $M_n^b$<br>(g mol <sup>-1</sup> ) | $M_w^b$<br>(g mol <sup>-1</sup> ) | $\mathcal{D}^b$ |
|------------|--------------|----------------------------------------|------------------------|--------------------------------------|-----------------------------------|-----------------------------------|-----------------|
| PMMA 1     | $\alpha$ PMA | 16,400                                 | 83                     | 30,000                               | 24,000                            | 28,900                            | 1.20            |
| PMMA 1     | $\alpha$ PA  | 16,400                                 | 76                     | 28,900                               | 19,500*                           | 25,500                            | 1.31            |
| PMMA 2     | $\beta$ PMA  | 18,700                                 | 88                     | 35,200                               | 29,200                            | 36,700                            | 1.26            |
| PMMA 2     | $\beta$ PA   | 18,700                                 | 75                     | 32,700                               | 19,200*                           | 28,500                            | 1.48            |
| PMMA 2     | LiMA         | 18,700                                 | 84                     | 34,400                               | 25,200                            | 31,600                            | 1.25            |
| PMMA 2     | LiA          | 18,700                                 | 65                     | 30,900                               | 23,700                            | 29,400                            | 1.28            |

<sup>a</sup>Measured by <sup>1</sup>H NMR, <sup>b</sup> measured by GPC (RI detector). \* $M_n$  values reduced due to presence of low molecular weight tailing.  $M_n$ (th) values obtained from the target  $M_n$  (block 2) x conversion + measured  $M_n$  of macro-RAFT agent. The  $M_n$  values for the diblock copolymers are consistently low, despite the low dispersities, which may indicate a systematic issue with the GPC, or that the PMMA macro-RAFT agent measurements were too high.

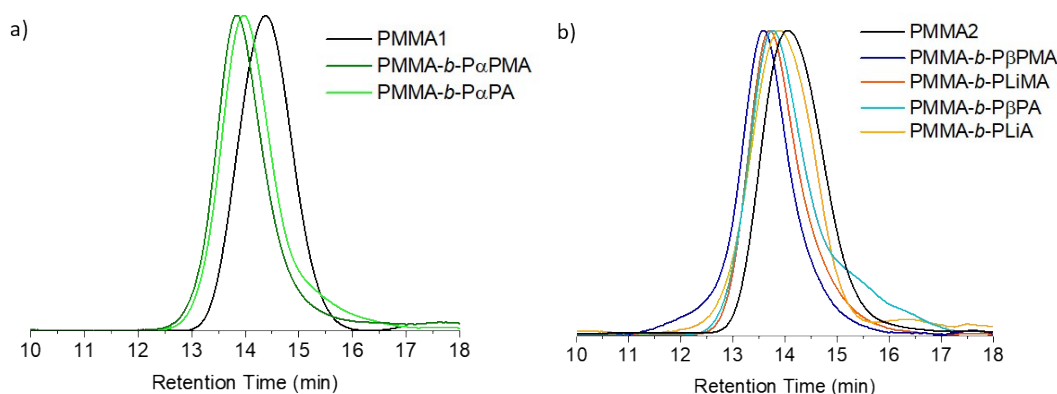

**Figure S2:** GPC traces showing PMMA macro RAFT agents and subsequent diblock copolymers with (a) P $\alpha$ PMA and P $\alpha$ PA, (b) P $\beta$ PMA, P $\beta$ PA, PLiMA and PLiA.

**Table S2:** Table of  $T_g$  data for the terpene (meth)acrylate homopolymers from DSC and DMA, with corresponding molecular weights. Higher  $T_g$  values have generally been observed for the DMA measurements, but at higher molecular weights (e.g. P $\alpha$ PMA above 100,000 g mol<sup>-1</sup>) this difference appears to be less pronounced.

| Polymer        | $M_n$ (g mol <sup>-1</sup> ) <sup>a</sup> / $\bar{D}$ | $T_g$ (DSC) <sup>b</sup> | $M_n$ (g mol <sup>-1</sup> ) <sup>a</sup> / $\bar{D}$ | $T_g$ (DMA) |
|----------------|-------------------------------------------------------|--------------------------|-------------------------------------------------------|-------------|
| P $\alpha$ PMA | 22,000 / 1.85                                         | 142                      | 26,000 / 1.45                                         | 158         |
|                | 109,000 / 1.95                                        | 164*                     | 196,000 / 2.18                                        | 168         |
| P $\alpha$ PA  | 23,000 / 2.20                                         | 71                       | 46,000 / 2.04                                         | 84          |
| P $\beta$ PMA  | 21,000 / 1.53                                         | 115                      | 29,000 / 1.65                                         | 121         |
| P $\beta$ PA   | 32,02,000 / 2.06                                      | 41                       | -                                                     | -           |
| PLiMA          | -                                                     | -                        | 29,000 / 1.21                                         | 51          |
| PLiA           | 17,000 / 2.23                                         | -5                       | 160,000 / 3.96                                        | -3          |

<sup>a</sup>Measured by GPC, <sup>b</sup>DSC results obtained from reference.<sup>5</sup> 0.5 wt% CTA used in each case. \*This result was obtained in this work, broad DSC transition observed.

**Table S3:** Detailed results for the syntheses of monofunctional RAFT agents P $\alpha$ PMA1, P $\alpha$ PMA2, P $\beta$ PMA1 and P $\beta$ PMA2, used in the synthesis of diblock copolymers.

| Polymer         | Monomer      | Target $M_n$ (g mol <sup>-1</sup> ) | Time (h) | Conv. (%) | $M_n$ (th) (g mol <sup>-1</sup> ) | $M_n$ (g mol <sup>-1</sup> ) | $M_w$ (g mol <sup>-1</sup> ) | $\bar{D}$ ** |
|-----------------|--------------|-------------------------------------|----------|-----------|-----------------------------------|------------------------------|------------------------------|--------------|
| P $\alpha$ PMA1 | $\alpha$ PMA | 30,000                              | 5h30*    | 58        | 17,400                            | 19,000                       | 24,000                       | 1.26         |
| P $\alpha$ PMA2 | $\alpha$ PMA | 30,000                              | 2h30*    | 62        | 18,600                            | 18,500                       | 23,700                       | 1.28         |
| P $\beta$ PMA1  | $\beta$ PMA  | 30,000                              | 6        | 65        | 19,500                            | 22,100                       | 17,800                       | 1.26         |
| P $\beta$ PMA2  | $\beta$ PMA  | 30,000                              | 4        | 58        | 17,400                            | 24,100                       | 27,600                       | 1.15         |

Molecular weights and dispersities measure using GPC. \*P $\alpha$ PMA1 carries out at 65 °C P $\alpha$ PMA2 carried out at 75 °C leading to a difference in reaction time

\*\* $\bar{D}$  values for P $\alpha$ PMA slightly elevated relative to others due to using RI detector rather than LS for the GPC measurement

**Table S4:** Results for the initial polymerisations of  $\alpha$ PMA using BDAT as a RAFT agent, and results for three repeats targeting molecular weights of 10,000 and 12,000 g mol<sup>-1</sup>, showing the range of molecular weights obtained.

| Entry | Target $M_n$<br>(g mol <sup>-1</sup> ) | Time<br>(h) | Conv. <sup>a</sup><br>(%) | $M_n$ (th)<br>(g mol <sup>-1</sup> ) | $M_n^b$<br>(g mol <sup>-1</sup> ) | $M_w^b$<br>(g mol <sup>-1</sup> ) | $\mathcal{D}^b$ |
|-------|----------------------------------------|-------------|---------------------------|--------------------------------------|-----------------------------------|-----------------------------------|-----------------|
| 1     | 5,000                                  | 26          | 97                        | 4,900                                | 8,100                             | 12,600                            | 1.55            |
| 2     | 10,000                                 | 1h30        | 58                        | 5,800                                | 20,900                            | 35,700                            | 1.71            |
| 3     | 50,000                                 | 2           | 41                        | 20,500                               | 42,200                            | 70,200                            | 1.66            |
| 4     | 10,000                                 | 50min       | 53                        | 5,300                                | 17,100                            | 27,200                            | 1.58            |
| 5     | 10,000                                 | 30          | 38                        | 3,800                                | 15,600                            | 24,400                            | 1.56            |
| 6     | 12,000                                 | 1           | 49                        | 5,900                                | 18,100                            | 30,000                            | 1.60            |
| 7     | 12,000                                 | 1           | 60                        | 7,200                                | 16,100                            | 25,000                            | 1.55            |
| 8     | 12,000                                 | 1           | 59                        | 7,100                                | 15,300                            | 23,400                            | 1.53            |

<sup>a</sup>Calculated from <sup>1</sup>H NMR measurements, <sup>b</sup>calculated from GPC measurements.

**Table S5:** Results for the polymerisation of  $\beta$ PMA using BDAT as the RAFT agent.

| Entry | Temp<br>(°C) | Target $M_n$<br>(g mol <sup>-1</sup> ) | Time<br>(h) | Conv. <sup>a</sup><br>(%) | $M_n$ (th)<br>(g mol <sup>-1</sup> ) | $M_n^b$<br>(g mol <sup>-1</sup> ) | $M_w^b$<br>(g mol <sup>-1</sup> ) | $\mathcal{D}^b$ |
|-------|--------------|----------------------------------------|-------------|---------------------------|--------------------------------------|-----------------------------------|-----------------------------------|-----------------|
| 1     | 65           | 10,000                                 | 23          | 74                        | 7,400                                | 24,600                            | 45,400                            | 1.84            |
| 2     | 75           | 10,000                                 | 2           | 81                        | 8,100                                | 15,800                            | 25,200                            | 1.59            |
| 3     | 75           | 10,000                                 | 1h15        | 59                        | 5,900                                | 9,000                             | 13,300                            | 1.47            |
| 4     | 75           | 10,000                                 | 1h30        | 54                        | 5,400                                | 17,100                            | 28,400                            | 1.66            |
| 5     | 75           | 20,000                                 | 1h15        | 62                        | 12,400                               | 19,000                            | 28,500                            | 1.50            |

<sup>a</sup>Calculated from <sup>1</sup>H NMR measurements, <sup>b</sup>calculated from GPC measurements. \*Carried out using the same ratios as seen in the paper by Ma et al.<sup>15</sup>

**Table S6:** Results for the synthesis of difunctional P $\alpha$ PMA and P $\alpha$  $\beta$ PMA macro-RAFT agents using BDAT RAFT agent, used in the synthesis of triblock copolymers.

| Polymer         | Monomer      | Target $M_n$<br>(g mol <sup>-1</sup> ) | Time (h) | Conv. <sup>a</sup> (%) | $M_n$ (th)<br>(g mol <sup>-1</sup> ) | $M_n^b$<br>(g mol <sup>-1</sup> ) | $M_w^b$<br>(g mol <sup>-1</sup> ) | $\mathcal{D}^b$ |
|-----------------|--------------|----------------------------------------|----------|------------------------|--------------------------------------|-----------------------------------|-----------------------------------|-----------------|
| P $\alpha$ PMA3 | $\alpha$ PMA | 10,000                                 | 50 min   | 53                     | 5,300                                | 17,100                            | 27,200                            | 1.58            |
| P $\alpha$ PMA4 | $\alpha$ PMA | 12,000                                 | 1        | 59                     | 7,100                                | 15,300                            | 23,400                            | 1.53            |
| P $\alpha$ PMA5 | $\alpha$ PMA | 12,000                                 | 1        | 49                     | 5,900                                | 18,100                            | 30,000                            | 1.60            |
| P $\alpha$ PMA6 | $\alpha$ PMA | 50,000                                 | 2        | 41                     | 20,500                               | 42,200                            | 70,200                            | 1.66            |
| P $\beta$ PMA3  | $\beta$ PMA  | 10,000                                 | 1h30     | 54                     | 5,400                                | 17,100                            | 28,400                            | 1.66            |
| P $\beta$ PMA4  | $\beta$ PMA  | 10,000                                 | 1h15     | 59                     | 5,900                                | 9,000                             | 13,300                            | 1.47            |

<sup>a</sup>Calculated from <sup>1</sup>H NMR measurements, <sup>b</sup>calculated from GPC measurements.

**Table S7:** Results for the chain extensions of each of the difunctional macro-RAFT agents with BuA or LiA.

| Polymer                                                             | Mon. | RAFT Agent      | Target $M_n$ (B2) ( $g\ mol^{-1}$ ) | Time (h) | Conv. <sup>a</sup> (%) | $M_n$ (th) ( $g\ mol^{-1}$ ) | $M_n^b$ ( $g\ mol^{-1}$ ) | $M_w^b$ ( $g\ mol^{-1}$ ) | $\bar{D}^b$ | Wt% <sup>a</sup> | Dn/dc <sup>c</sup> |
|---------------------------------------------------------------------|------|-----------------|-------------------------------------|----------|------------------------|------------------------------|---------------------------|---------------------------|-------------|------------------|--------------------|
| <b><math>\alpha</math>B<math>\alpha</math>-74-23</b>                | BuA  | P $\alpha$ PMA3 | 59,000                              | 24 h     | 97                     | 74,300                       | 73,800                    | 96,900                    | 1.31        | 23               | 0.0760             |
| <b><math>\alpha</math>Li</b>                                        | LiA  | P $\alpha$ PMA4 | 30,000                              | 28       | 63                     | 34,500                       | 45,600                    | 91,400                    | 2.01        | 47               | -                  |
| <b><math>\alpha</math>B<math>\alpha</math>-64-28</b>                | BuA  | P $\alpha$ PMA5 | 46,000                              | 24 h     | 97                     | 62,400                       | 64,400                    | 87,000                    | 1.35        | 28               | 0.0780             |
| <b><math>\alpha</math>B<math>\alpha</math>-60-33</b>                | BuA  | P $\alpha$ PMA5 | 37,000                              | 24 h     | 96                     | 53,200                       | 60,200                    | 79,900                    | 1.34        | 33               | 0.0799             |
| <b><math>\alpha</math>B<math>\alpha</math>-91-42</b>                | BuA  | P $\alpha$ PMA6 | 73,000                              | 24 h     | 76                     | 98,100                       | 91,400                    | 149,700                   | 1.63        | 42               | 0.0834             |
| <b><math>\beta</math><math>\beta</math><math>\beta</math>-67-25</b> | BuA  | P $\beta$ PMA3  | 50,000                              | 72       | 96                     | 65,100                       | 66,800                    | 92,400                    | 1.38        | 25*              | 0.0770             |
| <b><math>\beta</math><math>\beta</math><math>\beta</math>-46-23</b> | BuA  | P $\beta$ PMA4  | 30,000                              | 28       | 98                     | 38,400                       | 46,100                    | 66,200                    | 1.44        | 23*              | 0.0762             |
| <b><math>\beta</math>Li<math>\beta</math></b>                       | LiA  | P $\beta$ PMA3  | 30,000                              | 28       | 67                     | 29,100                       | 21,200*                   | 67,800*                   | 3.21        | 31*              | -                  |

<sup>a</sup>Calculated from  $^1H$  NMR measurements, <sup>b</sup>calculated from GPC measurements, <sup>c</sup>calculated from the molar fractions of each block and homopolymer dn/dc values using Equation 2.1.

\*Wt% estimated from the theoretical molecular weight, due to some overlap of the P $\beta$ PMA and PLiA/PBuA polymer peaks in the  $^1H$  NMR spectrum.

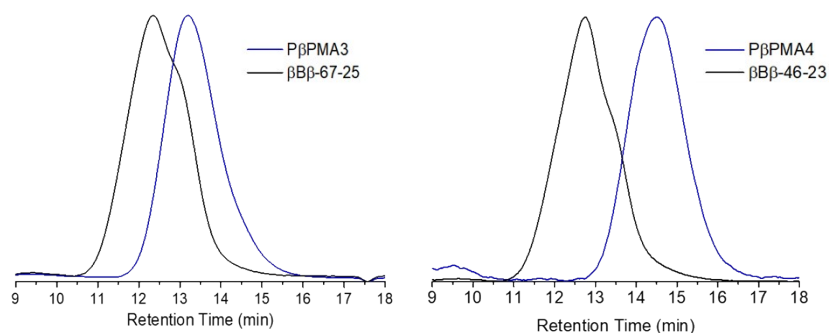

**Figure S3:** GPC traces for each of the P $\beta$ PMA-*b*-PBuA-*b*-P $\beta$ PMA triblock copolymers and their corresponding macro-RAFT agents.

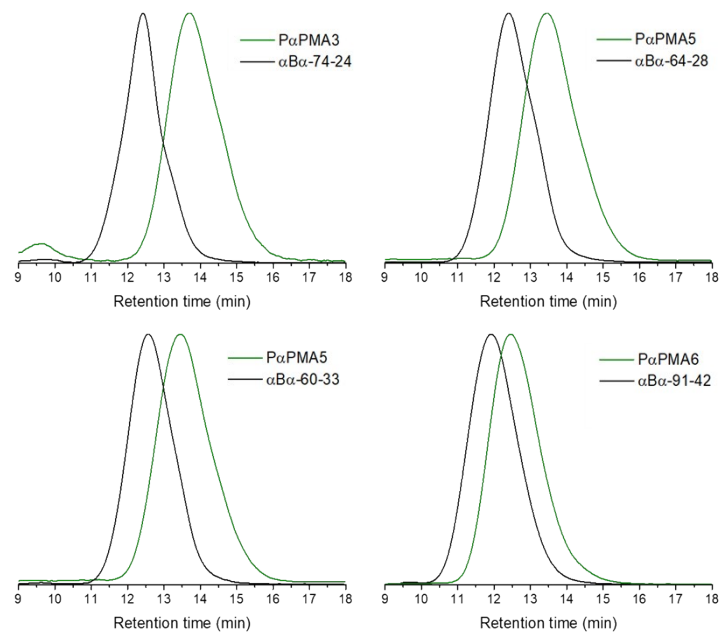

**Figure S4:** GPC traces for each of the PαPMA-*b*-PBuA-*b*-PαPMA triblock copolymers and their corresponding macro-RAFT agents.

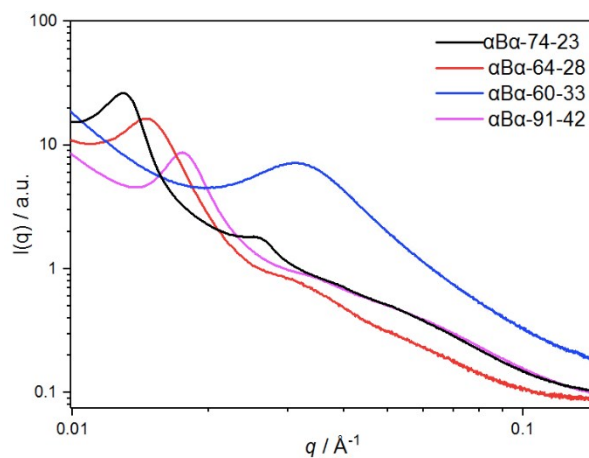

**Figure S5:** 1D radially integrated SAXS profiles of triblock copolymers αBα-[74-23 (black), 64-28 (red), 60-33 (blue) & 91-42 (magenta)].

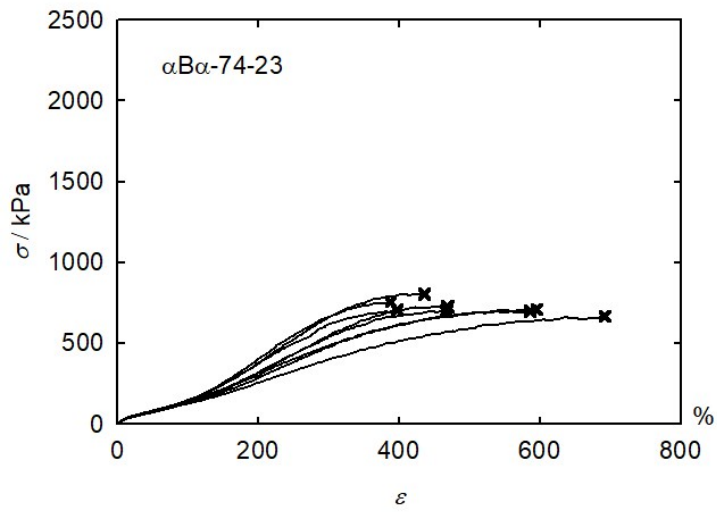

**Figure S6:** Repeat measurements for the tensile testing of  $\alpha\text{Ba-74-23}$ .

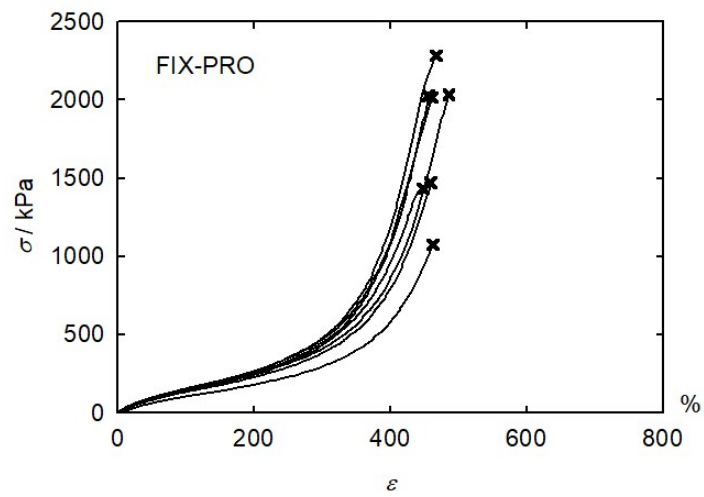

**Figure S7:** Repeat measurements for the tensile testing of FIX-PRO.
